# Supplementary material for: Cerevisterol Alleviates Inflammation via Suppression of MAPK/NF-κB/AP-1 and Activation of the Nrf2/HO-1 Signaling Cascade
Source: PubMed Central journal article supplement (PMC7072429; doi:10.3390/biom10020199), 2020-01-29
Supplement: biomolecules-10-00199-s001.pdf [file biomolecules-10-00199-s001.pdf]

# Cerevisterol Alleviates Inflammation via Suppression of MAPK/NF- $\kappa$ B/AP-1 and Activation of the Nrf2/HO-1 Signaling Cascade

Md Badrul Alam <sup>1,2,†</sup>, Nargis Sultana Chowdhury <sup>3,†</sup>, Md Hossain Sohrab <sup>4</sup>, Md Sohel Rana <sup>5</sup>, Choudhury Mahmood Hasan <sup>6</sup> and Sang-Han Lee <sup>1,2,7,\*</sup>

<sup>1</sup> Department of Food Science and Biotechnology, Graduate School, Kyungpook National University, Daegu 41566, Korea

<sup>2</sup> Food and Bio-Industry Research Institute, Inner Beauty/Anti-Aging Center, Kyungpook National University, Daegu 41566, Korea

<sup>3</sup> Department of Pharmacy, Manarat International University, Dhaka 1212, Bangladesh

<sup>4</sup> Pharmaceutical Sciences Research Division (PSRD), BCSIR Laboratories, Dhaka 1205, Bangladesh

<sup>5</sup> Department of Pharmacy, Jahangirnagar University, Dhaka 1342, Bangladesh

<sup>6</sup> Department of Pharmaceutical Chemistry, University of Dhaka, Dhaka 1205, Bangladesh

<sup>7</sup> knu BnC, Daegu 41566, Korea

\* Correspondence: sang@knu.ac.kr; Tel.: +82-53-950-7754; Mobile: +82-10-2537-7659; Fax: +82-53-950-6772

† These authors contributed equally to the study.

## Materials and Methods

### *Chemicals and reagents*

LPS (Escherichia coli 055:B5), N6-(1-iminoethyl)-lysine, hydrochloride (L-NIL), N-[2-(cyclohexyloxy)-4-nitrophenyl] methanesulfonamide (NS-398), Hanks' balanced salt solution (HBSS) and 3-(4,5-dimethylthiazol-2-yl)-2,5-diphenyltetrazolium bromide (MTT) were purchased from Sigma (St. Louis, MO, USA). Dulbecco's modified Eagle's medium (DMEM), fetal bovine serum (FBS), and penicillin and streptomycin were obtained from Invitrogen-Gibco (Grand Island, NY, USA). Enzyme-linked immunosorbent assay (ELISA) kits of mouse TNF- $\alpha$ , IL-1 $\beta$ , and IL-6 were provided by Biolegend (San Diego, CA, USA). The HO-1 inducer CoPP and inhibitor SnPP, and the Nrf2 inhibitor brusatol were obtained from Santa Cruz Biotechnology (San Diego, CA, USA). The NF- $\kappa$ B inhibitor ammonium pyrrolidine dithiocarbamate (PDTC), and AP-1 inhibitor SP100030 were purchased from R&D Systems, Inc. (Minneapolis, MN, USA).

### *Isolation and Characterization of cerevisterol*

In this study, we investigated the fungal endophyte *Fusarium solani* isolated from the roots of *Aponogeton undulates* Roxb. growing in the deep water of Bangladesh. Cerevisterol (CRVS) (Figure S1) was obtained as colourless, needle-like crystal (25 mg) from a sub-column fraction with the polar eluent system 5% MeOH in EtOAc (v/v). It appeared as a dark quenching spot on the TLC plate ( $R_f$  = 0.23, CHCl<sub>3</sub> / 20 % MeOH) under UV light at 254 nm and also exhibited blue fluorescence at 365 nm. Compound CRVS is soluble in CHCl<sub>3</sub> and MeOH.

The  $^1\text{H}$  NMR (400 MHz,  $\text{CDCl}_3$ ) and  $^{13}\text{C}$  NMR (100 MHz,  $\text{CDCl}_3$ ) data of CRVS (Table S1, Figure S2-S3) proved the presence of 28 carbon-atom signals corresponding to two tertiary methyl, four secondary methyl, seven methylene, eleven methine and four quaternary carbons (Table S1).

In the mass spectrum of CRVS (Figure S4), the fragment ion peaks were very similar to those of an ergosterol derivative. An accurate mass measurement of CRVS obtained by HR-ESIMS yielded a parent mass at  $m/z$  453.3349 in a positive ionization mode that, in conjunction with the data of the NMR spectrum, suggested the sodium adduct  $[\text{M} + \text{Na}]^+$  of a compound with molecular formula  $\text{C}_{28}\text{H}_{46}\text{O}_3$  (calculated for  $\text{C}_{28}\text{H}_{46}\text{O}_3\text{Na}$ , 453.3349).

$^1\text{H}$  NMR and  $^{13}\text{C}$  NMR data of compound CRVS indicates that it is structurally related to cerevesterol isolated from the fruiting bodies of Ascomycetes *Tuber indicum* [1]. These facts indicated that compound CRVS is (22*E*, 24*R*)-ergosta-7, 22-dien-3 $\beta$ , 5 $\alpha$ , 6 $\beta$ -triol, confirmed by direct comparison with literature data. Cerevesterol is reported for the first time from the species *Fusarium solani*.

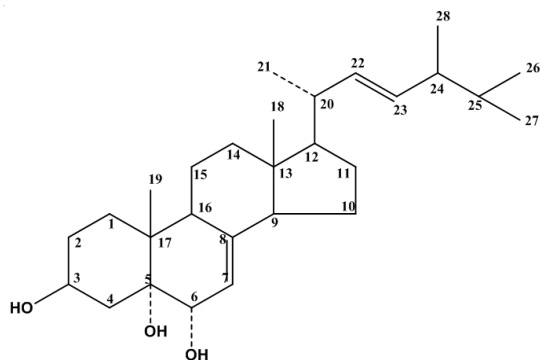

**Figure S1:** Structure of cerevesterol.

**Table S1:**  $^1\text{H}$  (400 MHz,  $\text{CDCl}_3$ ) and  $^{13}\text{C}$  (100 MHz,  $\text{CDCl}_3$ ) NMR data for cerevisterol

| position | $\delta_{\text{H}}$ , (mult., $J$ in Hz) | $\delta_{\text{C}}$ , type |
|----------|------------------------------------------|----------------------------|
| 1        | 5.14, dd (15, 7)                         | 32.9, $\text{CH}_2$        |
| 2        |                                          | 33.1, $\text{CH}_2$        |
| 3        | 4.07, m                                  | 67.7, CH                   |
| Hax-4    | 2.13, q (12.2)                           | 42.9, $\text{CH}_2$        |
| Heq-4    | 1.76, dd (16.4 & 3.6)                    |                            |
| 5        |                                          | 73.7, C                    |
| 6        | 3.61, br.s                               | 75.9, CH                   |
| 7        | 5.34, br.s                               | 117.5, CH                  |
| 8        |                                          | 144.0, C                   |
| 9        |                                          | 43.5, CH                   |
| 10       |                                          | 39.2, C                    |
| 11       |                                          | 22.1, $\text{CH}_2$        |
| 12       |                                          | 39.4, $\text{CH}_2$        |
| 13       |                                          | 43.8, C                    |
| 14       |                                          | 54.9, CH                   |
| 15       |                                          | 22.9, $\text{CH}_2$        |
| 16       |                                          | 30.9 $\text{CH}_2$         |
| 17       |                                          | 56.0, CH                   |
| 18       | 0.58, s                                  | 12.4, $\text{CH}_3$        |
| 19       | 1.07, s                                  | 18.6, $\text{CH}_3$        |
| 20       |                                          | 40.4, CH                   |
| 21       | 1.01, d (6.4)                            | 20.0, $\text{CH}_3$        |
| 22       | 5.14, dd (15.2 & 7.4)                    | 135.3, CH                  |
| 23       | 5.22, dd (15.2 & 7.4)                    | 132.2, CH                  |
| 24       |                                          | 42.8, CH                   |
| 25       |                                          | 33.1, CH                   |
| 26       | 0.81, d (6.4)                            | 21.1, $\text{CH}_3$        |

|    |               |                       |
|----|---------------|-----------------------|
| 27 | 0.82, d (6.4) | 19.8, CH <sub>3</sub> |
| 28 | 0.90, d (6.8) | 17.6, CH <sub>3</sub> |

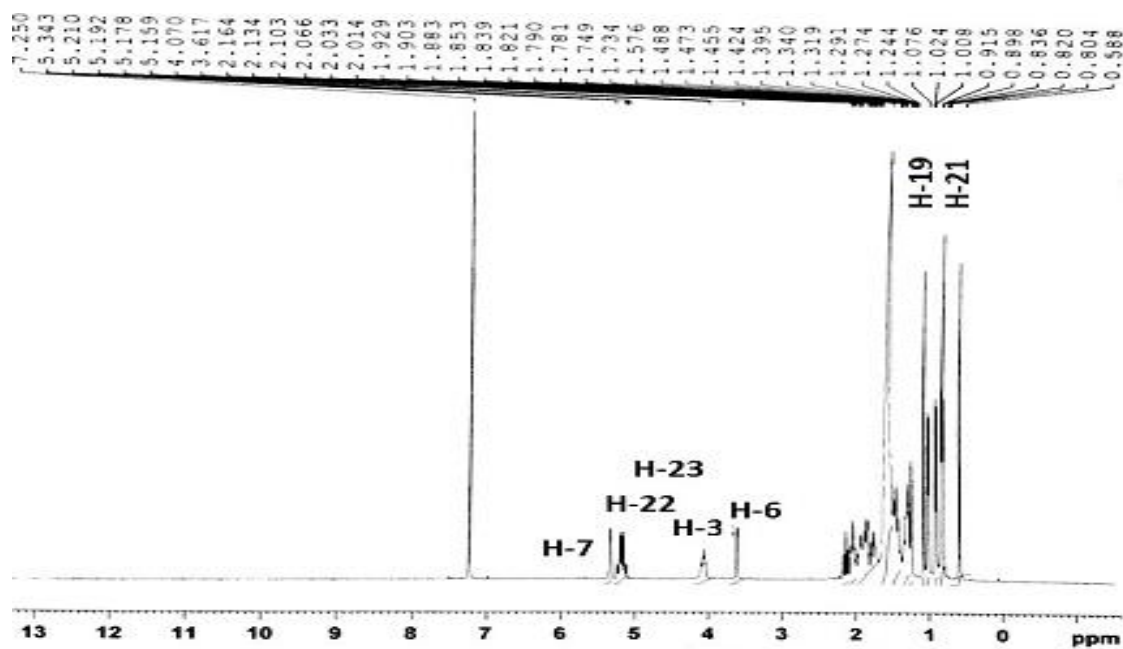

Figure S2: <sup>1</sup>H NMR spectrum (400 MHz, CDCl<sub>3</sub>) of cerevisterol.

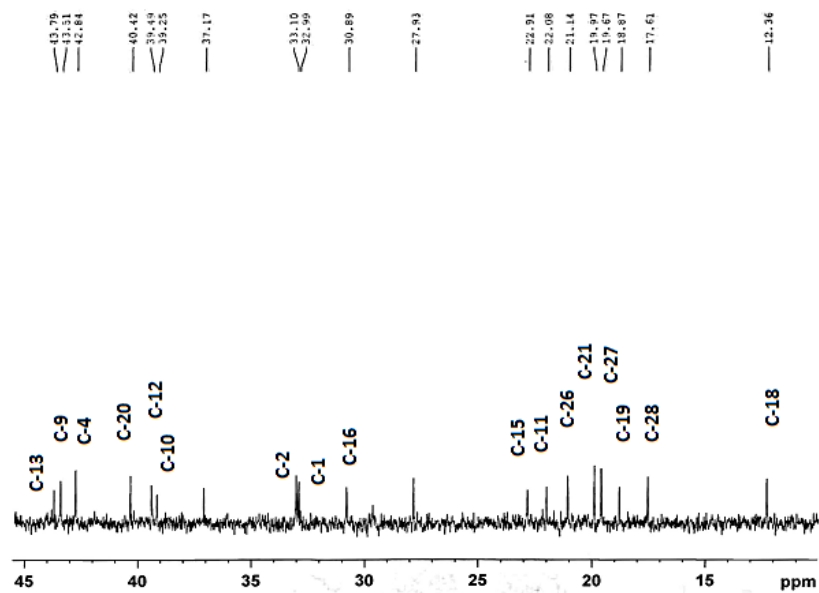

Figure S3: <sup>13</sup>C NMR spectrum (100 MHz, CDCl<sub>3</sub>) of cerevisterol.

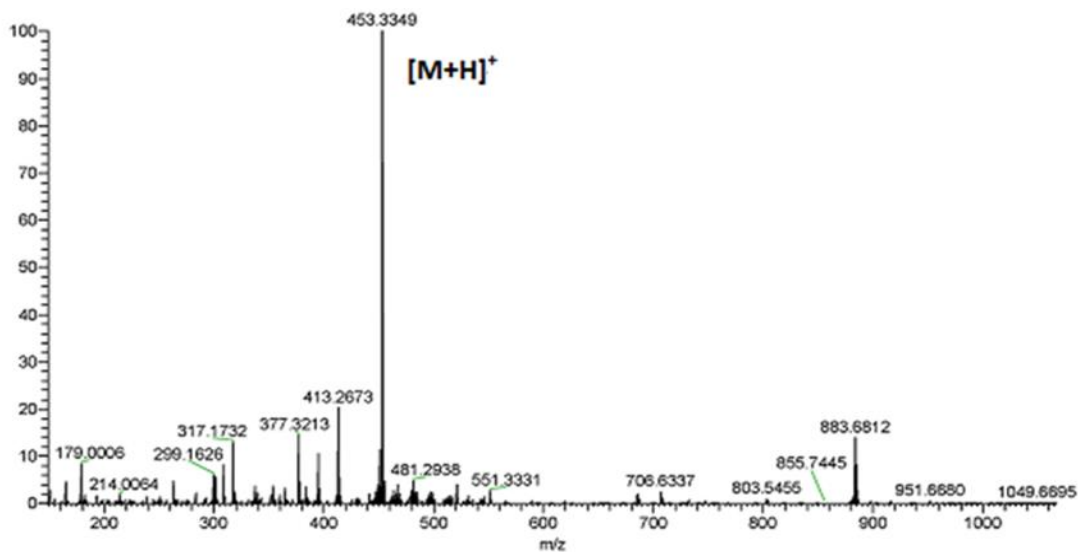

Figure S4: HRMS spectrum of cerevisterol.

Table S2: List of the primer sets used in the study

| <i>Gene name</i>               |                | <i>Sequences</i>        |
|--------------------------------|----------------|-------------------------|
| <i>iNOS</i>                    | <i>forward</i> | GGCTGTCAGAGCCTCGTGGC    |
|                                | <i>reverse</i> | CCCTTCCGAAGTTTCTGGCA    |
| <i>COX2</i>                    | <i>forward</i> | AACACAGCTACGAAAACC      |
|                                | <i>reverse</i> | CACAGTATGATGTAACAGT     |
| <i>TNF-<math>\alpha</math></i> | <i>forward</i> | GGCAGGTCTACTTTGGAGTCA   |
|                                | <i>reverse</i> | ACATTTCGAGGCTCCAGTGAAT  |
| <i>IL-1<math>\beta</math></i>  | <i>forward</i> | ATGGCAACTGTTCCCTGAACTC  |
|                                | <i>reverse</i> | CAGGACAGGTATAGATTCTTT   |
| <i>IL-6</i>                    | <i>forward</i> | GAGGATAACCACTCCCAACAGA  |
|                                | <i>reverse</i> | AAGTGCATCATCGTTGTTTCATA |
| <i>Gapdh</i>                   | <i>forward</i> | TTGTGATGGGTGTGAACCAC    |
|                                | <i>reverse</i> | ACACATTGGGGGTAGGAACA    |

**Table S3: List of the primary antibodies used in the study**

| <b>Name</b>                   | <b>Catalog no.</b> | <b>Company</b>                 | <b>Antigen</b>         | <b>Host</b> |
|-------------------------------|--------------------|--------------------------------|------------------------|-------------|
| Anti-iNOS                     | MAB9502            | R&D systems                    | iNOS                   | Mouse       |
| Anti-COX2                     | AF4198             | R&D systems                    | COX2                   | Goat        |
| Anti-HO-1                     | sc-136256          | Santa Cruz Biotechnology, Inc. | HO-1                   | Mouse       |
| Anti Nrf2                     | sc-81342           | Santa Cruz Biotechnology, Inc. | Nrf2                   | Mouse       |
| Anti-p-I $\kappa$ B- $\alpha$ | sc-8404            | Santa Cruz Biotechnology, Inc. | I $\kappa$ B- $\alpha$ | Mouse       |
| Anti-I $\kappa$ B- $\alpha$   | sc-373893          | Santa Cruz Biotechnology, Inc. | I $\kappa$ B- $\alpha$ | Mouse       |
| Anti-NF- $\kappa$ B (p65)     | BS1254             | Bioworld Technology, Inc.      | NF- $\kappa$ B (p65)   | Rabbit      |
| Anti-p-c-Jun                  | BS4050             | Bioworld Technology, Inc.      | c-Jun (Y-170)          | Rabbit      |
| Anti-p-c-Fos                  | sc-81485           | Santa Cruz Biotechnology, Inc. | c-Fos (S374)           | Mouse       |
| Anti-Histone H3               | BS1405             | Bioworld Technology, Inc.      | Histone H3             | Rabbit      |
| Anti-p-p38                    | sc-166182          | Santa Cruz Biotechnology, Inc. | p38                    | Mouse       |
| Anti-p38                      | BS3567             | Bioworld Technology, Inc.      | p38                    | Rabbit      |
| Anti-p-ERK1/2                 | sc-7383            | Santa Cruz Biotechnology, Inc. | ERK                    | Mouse       |
| Anti-ERK1/2                   | BS 6472            | Bioworld Technology, Inc.      | ERK                    | Rabbit      |
| Anti-p-JNK                    | BS 4322            | Bioworld Technology, Inc.      | JNK                    | Rabbit      |
| Anti-JNK                      | sc-7345            | Santa Cruz Biotechnology, Inc. | JNK                    | Mouse       |
| Anti- $\beta$ -actin          | Sc-47778           | Santa Cruz Biotechnology, Inc. | $\beta$ -actin         | Mouse       |
| Anti-NQO1                     | sc-271116          | Santa Cruz Biotechnology, Inc. | NQO1                   | Mouse       |
| Anti-Keap-1                   | sc-365626          | Santa Cruz Biotechnology, Inc. | Keap1                  | Mouse       |

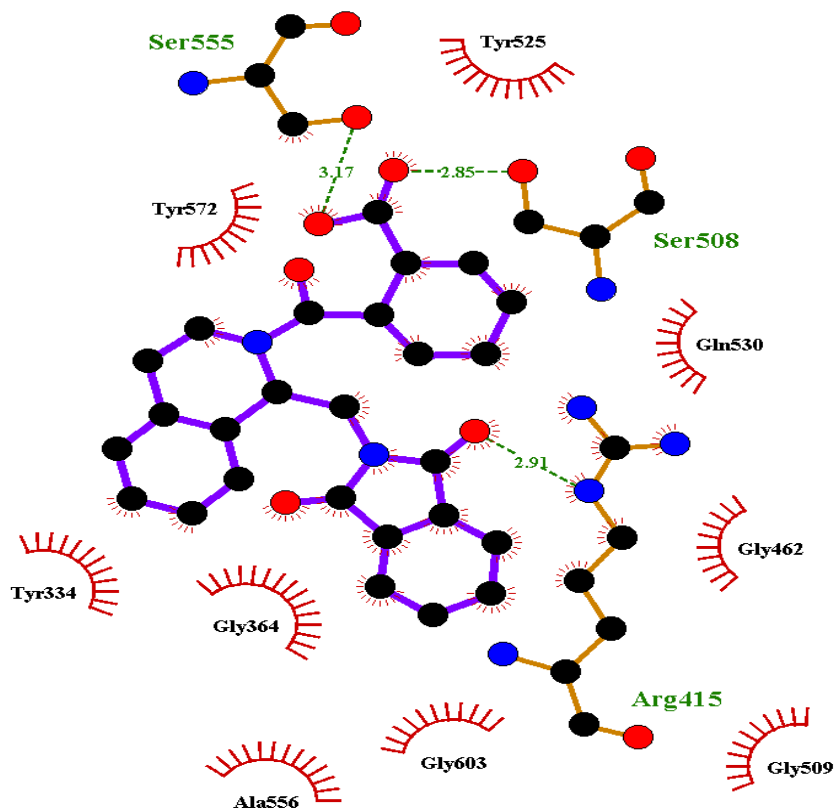

**Figure S5:** The molecular docking analysis of IVV with Keap-1. Binding mode of IVV (default ligand binding with Keap-1) and Keap-1 in the co-crystallization form (PDB code 3L7B) (C). 2D binding interaction between IVV and Keap-1 was generated by LigPlot. The green dotted lines represent the hydrogen bond interaction (D).

#### References

1. Jinming, G.; Lin, H.; Jikai, L. A novel sterol from Chinese truffles *Tuber indicum*. *Steroids* **2001**, *66*, 771–775.
